# Supplementary material for: Predictive Value of 18F‐Sodium Fluoride Positron Emission Tomography in Detecting High‐Risk Coronary Artery Disease in Combination With Computed Tomography
Source: PubMed Central journal article supplement — J Am Heart Assoc. 2018 Oct 3;7(20):e010224. doi: 10.1161/JAHA.118.010224 (PMC6474946; doi:10.1161/jaha.118.010224), 2018-10-03
Supplement: JAH3-7-e010224-s001.pdf [file JAH3-7-e010224-s001.pdf]

# **SUPPLEMENTAL MATERIAL**

**Table S1. Multivariate Analysis of CCTA findings and <sup>18</sup>F-NaF Uptake in Predicting Coronary Events.**

|                            | Model 1              | P value | Model 2              | P value | Model 3              | P value | Model 4               | P value |
|----------------------------|----------------------|---------|----------------------|---------|----------------------|---------|-----------------------|---------|
| Obstructive stenosis       | 3.0<br>(0.8 to 19.9) | 0.12    | 3.5<br>(0.9 to 23.4) | 0.076   | 5.4<br>(1.2 to 39.3) | 0.025   | 9.4<br>(1.5 to 118.4) | 0.014   |
| HRP                        | 1.4<br>(0.4 to 6.6)  | 0.57    | 1.3<br>(0.4 to 6.2)  | 0.65    | 1.6<br>(0.4 to 8.6)  | 0.55    | 1.0<br>(0.1 to 9.2)   | 0.97    |
| ≥1.28 M-TBR <sub>max</sub> | 5.3<br>(1.5 to 24.3) | 0.0082  | 4.5<br>(1.2 to 23.1) | 0.028   | 5.0<br>(1.1 to 30.8) | 0.037   | 8.2<br>(1.4 to 79.2)  | 0.020   |

Data are expressed as hazard ratio (95% confidence interval).

Model 1: unadjusted

Model 2: adjusted for age, sex

Model 3: adjusted for age, sex, coronary risk factor, statin use

Model 4: adjusted for age, sex, coronary risk factor, statin use, obstructive stenosis, HRP,  $M-TBR_{max} \geq 1.28$

$^{18}F-NaF$ ,  $^{18}F$ -sodium fluoride; CCTA, coronary computed tomography angiography; HRP, high-risk plaque;  $M-TBR_{max}$ , maximum  $TBR_{max}$  per patient;  $TBR_{max}$ , maximum tissue-to-background ratio.

**Table S2. Multivariate Analysis of CCTA findings in Predicting Higher  $^{18}\text{F}$ -NaF Uptake ( $\text{M-TBR}_{\text{max}} \geq 1.28$ ).**

|                      | Model 1              | P value | Model 2              | P value | Model 3               | P value | Model 4               | P value |
|----------------------|----------------------|---------|----------------------|---------|-----------------------|---------|-----------------------|---------|
| Obstructive stenosis | 1.2<br>(0.3 to 5.0)  | 0.75    | 1.3<br>(0.3 to 5.3)  | 0.74    | 1.1<br>(0.3 to 4.9)   | 0.90    | 0.9<br>(0.2 to 4.8)   | 0.87    |
| HRP                  | 5.6<br>(1.2 to 40.4) | 0.026   | 5.9<br>(1.2 to 44.1) | 0.024   | 10.2<br>(1.7 to 99.6) | 0.0082  | 10.3<br>(1.8 to 99.5) | 0.0081  |

Data are expressed as odds ratio (95% confidence interval).

Model 1: unadjusted

Model 2: adjusted for age, sex

Model 3: adjusted for age, sex, coronary risk factor, statin use

Model 4: adjusted for age, sex, coronary risk factor, statin use, obstructive stenosis, HRP

$^{18}\text{F-NaF}$ ,  $^{18}\text{F}$ -sodium fluoride; CCTA, coronary computed tomography angiography; HRP, high-risk plaque; M-TBR<sub>max</sub>, maximum TBR<sub>max</sub> per patient; TBR<sub>max</sub>, maximum tissue-to-background ratio.
